# Supplementary material for: Nuclear to cytoplasmic transport is a druggable dependency in MYC-driven hepatocellular carcinoma
Source: PubMed Central journal article supplement (PMC10834515; doi:10.1038/s41467-024-45128-y), 2024-02-01
Supplement: 41467_2024_45128_MOESM4_ESM.pdf [file 41467_2024_45128_MOESM4_ESM.pdf]

## Description of Additional Supplementary Files

**Supplementary Data 1:** Differential gene expression analysis (normalized counts). MYC-driven murine HCC cell line (EC4) pre ( $MYC^{high}$ ) and seven days post ( $MYC^{low}$ ) inactivation of MYC transgene expression (see Supplementary Figure 3b-e).

**Supplementary Data 2:** CRISPR-Cas9 screen essentiality scores.

**Supplementary Data 3:** Functional gene enrichment analysis of 1808 MYC synthetic-lethal genes (see Figure 1d).

**Supplementary Data 4:** Rank product analysis of gene essentiality scores in human HCC cell lines (CCLE).

**Supplementary Data 5:** Functional gene enrichment analysis of 342 genes in human HCC cell lines and murine HCC with high MYC expression (see Figure 1e).

**Supplementary Data 6:** Differential gene expression analysis ( $\log_2$ FoldChange). Primary murine HCC tumors pre ( $MYC^{high}$ ) and post ( $MYC^{low}$ ) inactivation of MYC transgene expression (see Figure 3a-c).

**Supplementary Data 7:** Differential gene expression analysis ( $\log_2$ FoldChange). Primary murine HCC tumors ( $MYC^{high}$ ) and normal liver (see Figure 3c).

**Supplementary Data 8:** Functional gene enrichment analysis of 516 MYC synthetic-lethal that are upregulated in primary murine  $MYC^{high}$  tumors (see Figure 3b).
